# Supplementary material for: Facile Synthesis of Spherical TiO2 Hollow Nanospheres with a Diameter of 150 nm for High-Performance Mesoporous Perovskite Solar Cells
Source: MDPI journal article supplement (doi:10.3390/ma14030629), 2021-01-29
Supplement: s1 [file s1]

SUPPLEMENTARY

# Facile Synthesis of Spherical TiO<sub>2</sub> Hollow Nanospheres with a Diameter of 150 nm for High-Performance Mesoporous Perovskite Solar Cells

Hoang Van Quy, Dang Hai Truyen, Sangmo Kim and Chung Wung Bark \*

Department of Electrical Engineering, Gachon University, Seongnam, Korea; quybk@gachon.ac.kr (H.V.Q); danghaitruyen@gmail.com (D.H.T.); singmul0227@gachon.ac.kr (S.K.)

\* Correspondence: bark@gachon.ac.kr

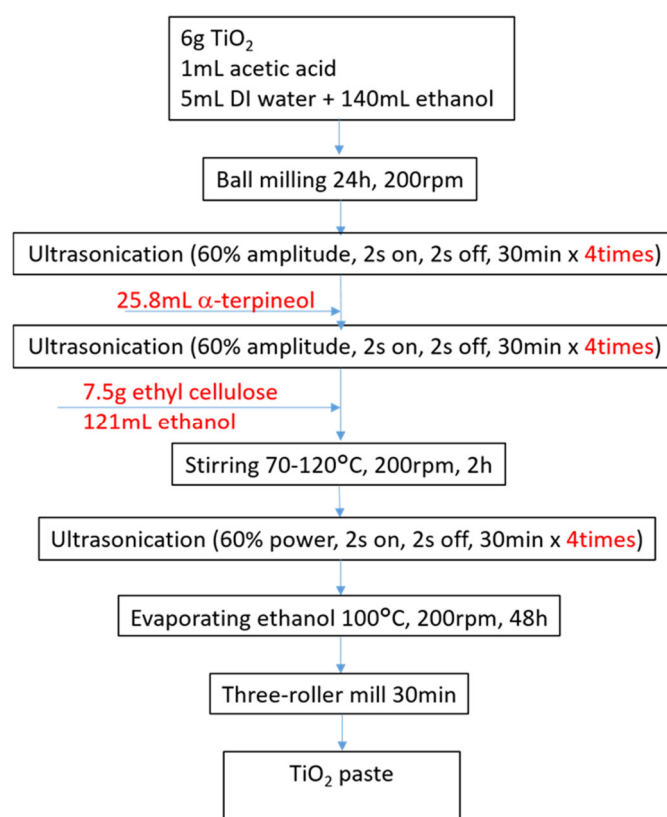

**Citation:** Quy, V.H.; Truyen, D.H.; Kim, S.; Bark, C.W. Facile synthesis of spherical TiO<sub>2</sub> hollow nanospheres with a diameter of 150 nm for high-performance mesoporous perovskite solar cells. *2021*, *14*, 629. <https://doi.org/10.3390/ma14030629>

Received: 29 December 2020

Accepted: 27 January 2021

Published: 29 January 2021

**Publisher's Note:** MDPI stays neutral with regard to jurisdictional claims in published maps and institutional affiliations.

**Figure S1.** Schematic representation for fabrication of TiO<sub>2</sub> paste.

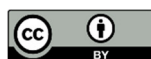

**Copyright:** © 2021 by the authors. Licensee MDPI, Basel, Switzerland. This article is an open access article distributed under the terms and conditions of the Creative Commons Attribution (CC BY) license (<http://creativecommons.org/licenses/by/4.0/>).

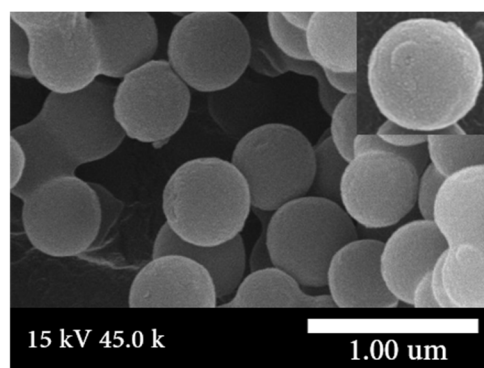

**Figure S2.** SEM image of carbonaceous nanosphere prepared by hydrothermal reaction.
